# Supplementary material
Source: PubMed Central journal article supplement (PMC3387412)
Supplement: supp_jc.2011-3432_11-3432_full_supplement.pdf [file supp_jc.2011-3432_11-3432_full_supplement.pdf]

## SUPPLEMENTAL MATERIALS

**Supplemental Table 1.** Published citations describing the functional characterization of human *MC4R* mutations.

| MUTATION                    | N Pts | Defect       | Citation                                                                                                                                                                                                                                                                                                                                |
|-----------------------------|-------|--------------|-----------------------------------------------------------------------------------------------------------------------------------------------------------------------------------------------------------------------------------------------------------------------------------------------------------------------------------------|
| <b>Pathogenic Mutations</b> |       |              |                                                                                                                                                                                                                                                                                                                                         |
| Het R7H                     | 1     |              | Xiang Z, Proneth B, Dirain ML, Litherland SA, Haskell-Luevano C. Pharmacological characterization of 30 human melanocortin-4 receptor polymorphisms with the endogenous proopiomelanocortin-derived agonists, synthetic agonists, and the endogenous agouti-related protein antagonist. 2010; <i>Biochemistry</i> Jun 8;49(22):4583-600 |
| Het T11A                    | 1     | Partial      | Farooqi IS, Keogh JM, Yeo GS, Lank EJ, Cheetham T, O'Rahilly S. Clinical spectrum of obesity and mutations in the melanocortin 4 receptor gene. 2003; <i>N Engl J Med</i> 348:1085-1095                                                                                                                                                 |
| Het S127L                   | 1     | Partial/full | Valli-Jaakola K, Lipsanen-Nyman M, Oksanen L, Hollenberg AN, Kontula K, Bjørbaek C, Schalin-Jääntti C. Identification and characterization of melanocortin-4 receptor gene mutations in morbidly obese Finnish children and adults. 2004; <i>J Clin Endocrinol Metab.</i> Feb;89(2):940-5.                                              |
| Het I137T                   | 2     |              | Gu W, Tu Z, Kleynt PW, Kissebah A, Duprat L, Lee J, Chin W, Maruti S, Deng N, Fisher SL, Franco LS, Burn P, Yagaloff KA, Nathan J, Heymsfield S, Albu J, Pi-Sunyer FX, Allison DB. 1999; Identification and functional analysis of novel human melanocortin-4                                                                           |

|                                  |   |         |                                                                                                                                                                                                                                                                                                                                                                                                                                                             |
|----------------------------------|---|---------|-------------------------------------------------------------------------------------------------------------------------------------------------------------------------------------------------------------------------------------------------------------------------------------------------------------------------------------------------------------------------------------------------------------------------------------------------------------|
|                                  |   |         | receptor variants. Diabetes 48:635–639                                                                                                                                                                                                                                                                                                                                                                                                                      |
| Het Q156P                        | 1 |         | Farooqi IS, Keogh JM, Yeo GS, Lank EJ, Cheetham T, O'Rahilly S. Clinical spectrum of obesity and mutations in the melanocortin 4 receptor gene. 2003; N Engl J Med 348:1085-1095                                                                                                                                                                                                                                                                            |
| Het A175T                        | 1 | Partial | Yeo GS, Lank EJ, Farooqi IS, Keogh J, Challis BG, O'Rahilly S. Mutations in the human melanocortin-4 receptor gene associated with severe familial obesity disrupts receptor function through multiple molecular mechanisms. 2003; Hum Mol Genet Mar 1;12(5):561-74<br><br>Farooqi IS, Keogh JM, Yeo GS, Lank EJ, Cheetham T, O'Rahilly S. Clinical spectrum of obesity and mutations in the melanocortin 4 receptor gene. 2003; N Engl J Med 348:1085-1095 |
| Het 597-599 delCAT,<br>T199TdelM | 1 |         | Farooqi, unpublished observation                                                                                                                                                                                                                                                                                                                                                                                                                            |
| Het F202L                        | 1 |         | Xiang Z, Proneth B, Dirain ML, Litherland SA, Haskell-Luevano C. Pharmacological characterization of 30 human melanocortin-4 receptor polymorphisms with the endogenous proopiomelanocortin-derived agonists, synthetic agonists, and the endogenous agouti-related protein antagonist. 2010; Biochemistry Jun 8;49(22):4583-600                                                                                                                            |

|           |   |         |                                                                                                                                                                                                                                                                                                                                                                                                                                                             |
|-----------|---|---------|-------------------------------------------------------------------------------------------------------------------------------------------------------------------------------------------------------------------------------------------------------------------------------------------------------------------------------------------------------------------------------------------------------------------------------------------------------------|
| Het N240S | 1 |         | Xiang Z, Proneth B, Dirain ML, Litherland SA, Haskell-Luevano C. Pharmacological characterization of 30 human melanocortin-4 receptor polymorphisms with the endogenous proopiomelanocortin-derived agonists, synthetic agonists, and the endogenous agouti-related protein antagonist. 2010; Biochemistry Jun 8;49(22):4583-600                                                                                                                            |
| Het G252S | 1 |         | Xiang Z, Pogozeva ID, Sorenson NB, Wilczynski AM, Holder JR, Litherland SA, Millard WJ, Mosberg HI, Haskell-Luevano C. Peptide and small molecules rescue the functional activity and agonist potency of dysfunctional human melanocortin-4 receptor polymorphisms. 2007; Biochemistry Jul 17;46(28):8273-87. Epub 2007 Jun 23                                                                                                                              |
| Het V253I | 1 | Partial | Yeo GS, Lank EJ, Farooqi IS, Keogh J, Challis BG, O'Rahilly S. Mutations in the human melanocortin-4 receptor gene associated with severe familial obesity disrupts receptor function through multiple molecular mechanisms. 2003; Hum Mol Genet Mar 1;12(5):561-74<br><br>Farooqi IS, Keogh JM, Yeo GS, Lank EJ, Cheetham T, O'Rahilly S. Clinical spectrum of obesity and mutations in the melanocortin 4 receptor gene. 2003; N Engl J Med 348:1085-1095 |
| Het L263V | 1 |         | Farooqi, unpublished observation                                                                                                                                                                                                                                                                                                                                                                                                                            |
| Het P299H | 1 |         | Lubrano-Berthelier C, Durand E, Dubern B, Shapiro A, Danzin P, Weill J, Ferron C,                                                                                                                                                                                                                                                                                                                                                                           |

|                                      |    |  |                                                                                                                                                                                                                                                                                                     |
|--------------------------------------|----|--|-----------------------------------------------------------------------------------------------------------------------------------------------------------------------------------------------------------------------------------------------------------------------------------------------------|
|                                      |    |  | Frougel P, Vaisse C. Intracellular retention is a common characteristic of childhood obesity-associated MC4R mutations. 2003; Hum Mol Genet Jan 15; 12(2): 145-53                                                                                                                                   |
| Het R331K                            | 1  |  | Farooqi, unpublished observation                                                                                                                                                                                                                                                                    |
| Het 333T-334A insA,<br>p.T112N fs10X | 1  |  | Yeo GS, Lank EJ, Farooqi IS, Keogh J, Challis BG, O'Rahilly S. Mutations in the human melanocortin-4 receptor gene associated with severe familial obesity disrupts receptor function through multiple molecular mechanisms. 2003; Hum Mol Genet Mar 1;12(5):561-74                                 |
|                                      |    |  |                                                                                                                                                                                                                                                                                                     |
| <b>Non-pathogenic Mutations</b>      |    |  |                                                                                                                                                                                                                                                                                                     |
| Het S4S                              | 1  |  | No change in protein sequence                                                                                                                                                                                                                                                                       |
| Het V103I                            | 20 |  | Gu W, Tu Z, Kleyn PW, Kissebah A, Duprat L, Lee J, Chin W, Maruti S, Deng N, Fisher SL, Franco LS, Burn P, Yagaloff KA, Nathan J, Heymsfield S, Albu J, Pi-Sunyer FX, Allison DB. 1999; Identification and functional analysis of novel human melanocortin-4 receptor variants. Diabetes 48:635–639 |
| Het A135A                            | 1  |  | No change in protein sequence                                                                                                                                                                                                                                                                       |
| Het T178T                            | 1  |  | No change in protein sequence                                                                                                                                                                                                                                                                       |
| Het I198I                            | 5  |  | No change in protein sequence                                                                                                                                                                                                                                                                       |
| Het I251L                            | 18 |  | Farooqi IS, Keogh JM, Yeo GS, Lank EJ, Cheetham T, O'Rahilly S. Clinical spectrum of obesity and mutations in the melanocortin 4 receptor gene. 2003; N Engl J Med                                                                                                                                  |

|           |   |  |                               |
|-----------|---|--|-------------------------------|
|           |   |  | 348:1085-1095                 |
| Het P272P | 1 |  | No change in protein sequence |
| Het G324G | 2 |  | No change in protein sequence |

**Supplemental Table 2.** Percent excess body weight loss (%EBWL) and percent weight change (%WC) at different time points by type of *MC4R* mutation.

|                       | Type of <i>MC4R</i> Mutation |                        |             |                            |             |
|-----------------------|------------------------------|------------------------|-------------|----------------------------|-------------|
|                       | None                         | Single Copy Pathogenic |             | Single Copy Non-Pathogenic |             |
|                       |                              | Weight Loss            | P vs. None* | Weight Loss                | P vs. None* |
| %EBWL at 1 year       | 71.5                         | 71.1                   | 0.68        | 69.8                       | 0.51        |
| %EBWL at 2 years      | 75.5                         | 72.7                   | 0.44        | 77.5                       | 0.42        |
| %EBWL at weight nadir | 79.6                         | 87.2                   | 0.41        | 78.2                       | 0.52        |
| %WC at 1 year         | 34.2                         | 35.4                   | 0.69        | 32.5                       | 0.63        |
| %WC at 2 years        | 37.3                         | 39.0                   | 0.58        | 36.6                       | 0.36        |
| %WC at weight nadir   | 39.1                         | 42.1                   | 0.53        | 37.4                       | 0.23        |

\*P-values from multivariable regressions adjusted for age, sex, preoperative BMI, and type 2 diabetes status

**Supplemental Table 3.** Percent excess body weight loss (%EBWL) and measures of glucose homeostasis at different time points in patients heterozygous for the I251L or V103I mutation in *MC4R*.

|                               | <i>MC4R</i> Mutation |                   |            |                   |            |
|-------------------------------|----------------------|-------------------|------------|-------------------|------------|
|                               | None                 | Single Copy I251L |            | Single Copy V103I |            |
|                               |                      | Characteristic    | P vs. None | Characteristic    | P vs. None |
| %EBWL at 1 year*              | 71.5                 | 73.4              | 0.36       | 73.2              | 0.40       |
| %EBWL at 2 years *            | 75.5                 | 72.5              | 0.43       | 72.6              | 0.39       |
| %EBWL at weight nadir*        | 79.6                 | 73.7              | 0.27       | 81.4              | 0.56       |
| Glucose (mg/dL) at baseline†  | 124.1                | 146.9             | 0.26       | 123.4             | 0.80       |
| Glucose (mg/dL) at 1 year†    | 93.7                 | 94.9              | 0.95       | 96.6              | 0.73       |
| Insulin (μIU/mL) at baseline† | 22.9                 | 20.5              | 0.45       | 18.6              | 0.38       |
| Insulin (μIU/mL) at 1 year†   | 7.2                  | 5.2               | 0.24       | 5.3               | 0.32       |
| HbA1c at baseline†            | 6.4                  | 7.2               | 0.19       | 6.6               | 0.80       |
| HbA1c at 1 year†              | 5.6                  | 5.5               | 0.56       | 5.5               | 0.65       |

\* P-values from multivariable regressions adjusted for age, sex, preoperative BMI and type 2 diabetes status

† P-values from multivariable regressions adjusted for age and sex

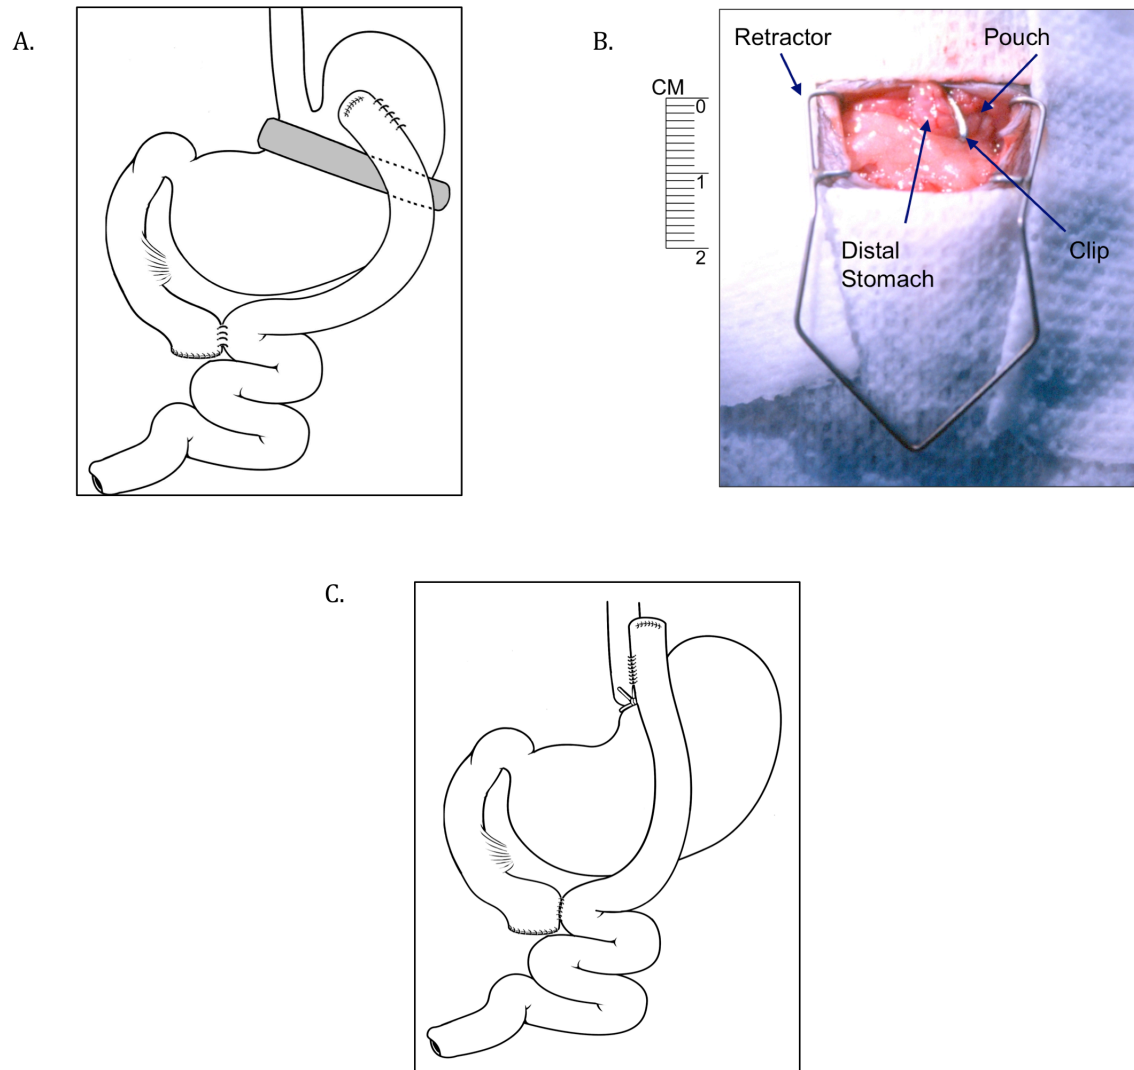

**Supplemental Figure 1. Gastric bypass in the mouse.** (A) Schematic and (B) photograph of the human-like RYGB (RYGB-H); the stomach is divided into a gastric pouch and distal stomach using a vascular clip, with a Roux limb length of approximately 6 cm, corresponding to 10-15% of the length of the small intestine. (C) Schematic of the complete gastric bypass (RYGB-C); the entire stomach is bypassed and the jejunum is connected to the esophagus, with an approximately 6 cm Roux limb.



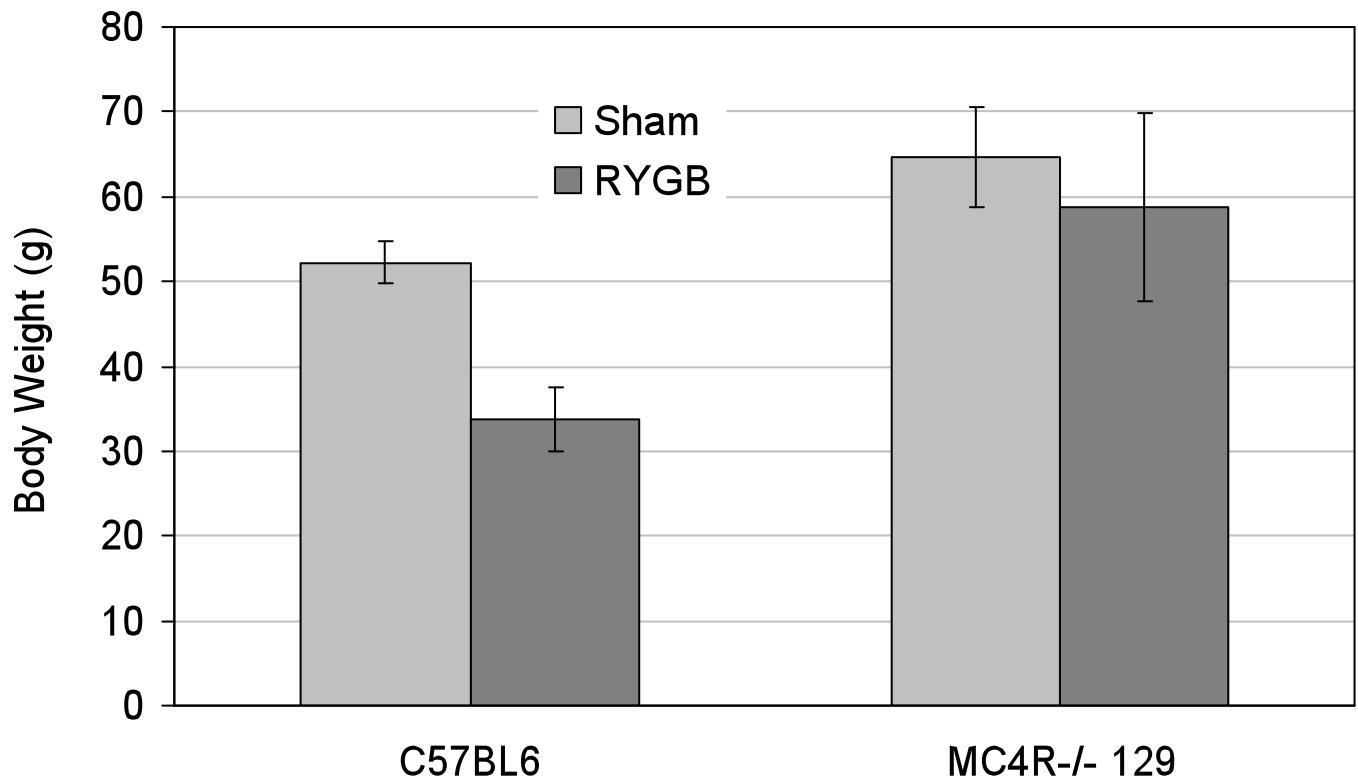

**Supplemental Figure 2. Weight loss one year after RYGB-H in the mouse.** Body weight (grams) in WT mice on a C57BL/6 background (left) and *MC4R*<sup>-/-</sup> mice on a 129 background. Light gray bars represent sham-operated animals. Dark gray bars represent RYGB-operated animals. Error bars denote the standard error of the mean.

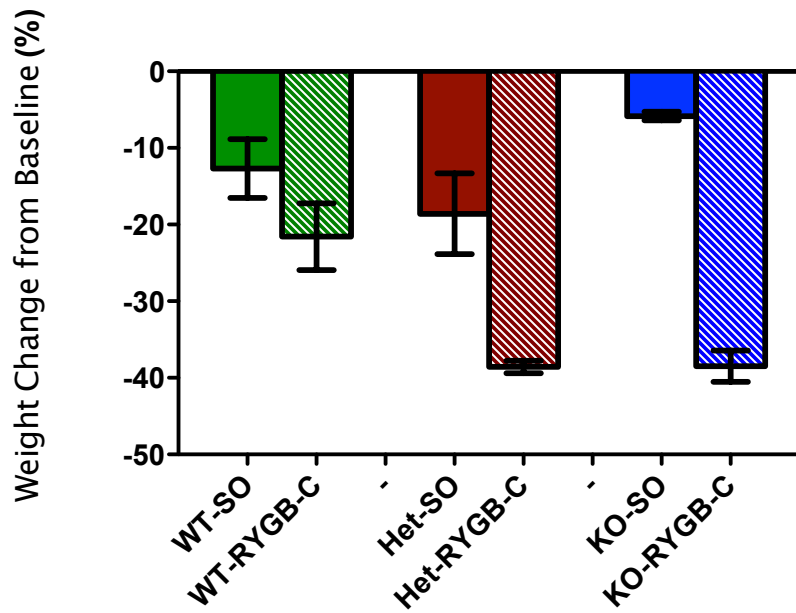

**Supplemental Figure 3. Percent weight change early after RYGB-C in wild-type (WT),  $MC4R^{+/-}$  heterozygous (Het), and  $MC4R^{-/-}$  null (KO) mice.** Change in body weight (percent) from postoperative week 0 to postoperative week 4 in RYGB-C and SO mice on a C57BL/6 background. Error bars denote the standard error of the mean.
